# Supplementary material for: Mineralization of poly(tetrafluoroethylene) and other fluoropolymers using molten sodium hydroxide
Source: Royal Society of Chemistry journal article supplement (doi:10.1039/d2gc00797e), 2022-01-01
Supplement: d2gc00797e1.pdf [file d2gc00797e1.pdf]

## Supporting Information

for

### **Mineralization of poly(tetrafluoroethylene) and other fluoropolymers by molten sodium hydroxide**

Naohisa Yanagihara and Takahiro Katoh

Department of Biosciences, Faculty of Science and Engineering, Teikyo University, 1-1 Toyosatodai, Utsunomiya, 320-8551, Japan.

#### **Content**

Figure S-1: TG/DTA curves for PTFE.

Figure S-2: TG/DTA curves for PVDF.

Figure S-3: TG/DTA curves for poly(VDF-co-HFP).

Figure S-4: TG/DTA curves for PCTFE.

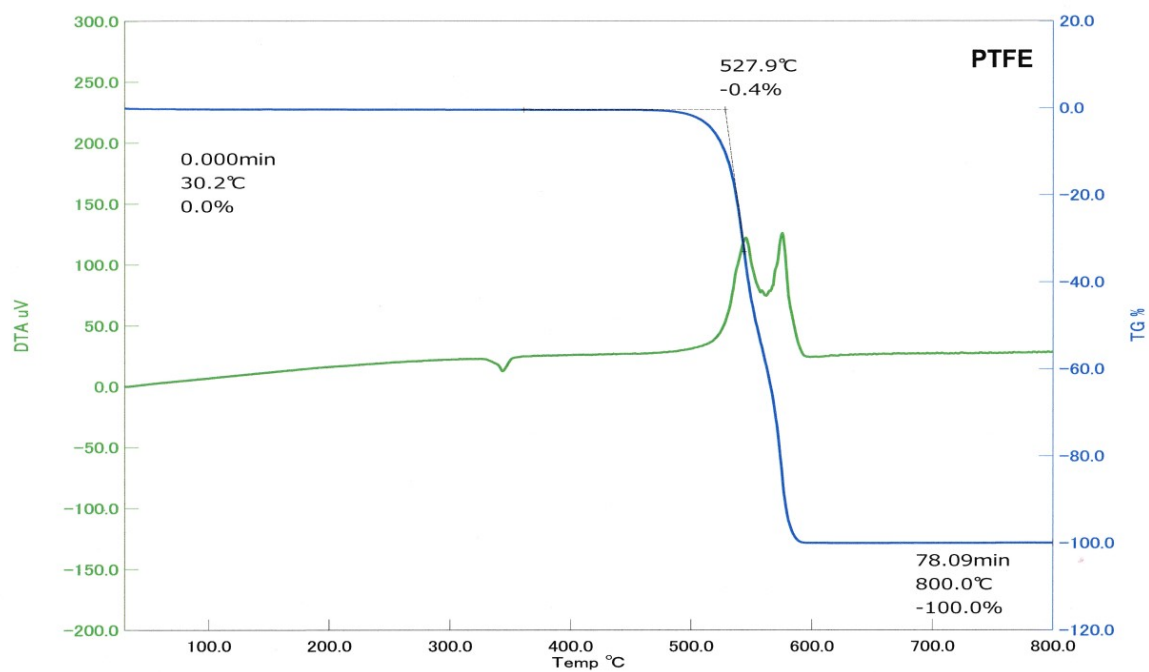

**Figure S-1.** TG/DTA curves for PTFE.

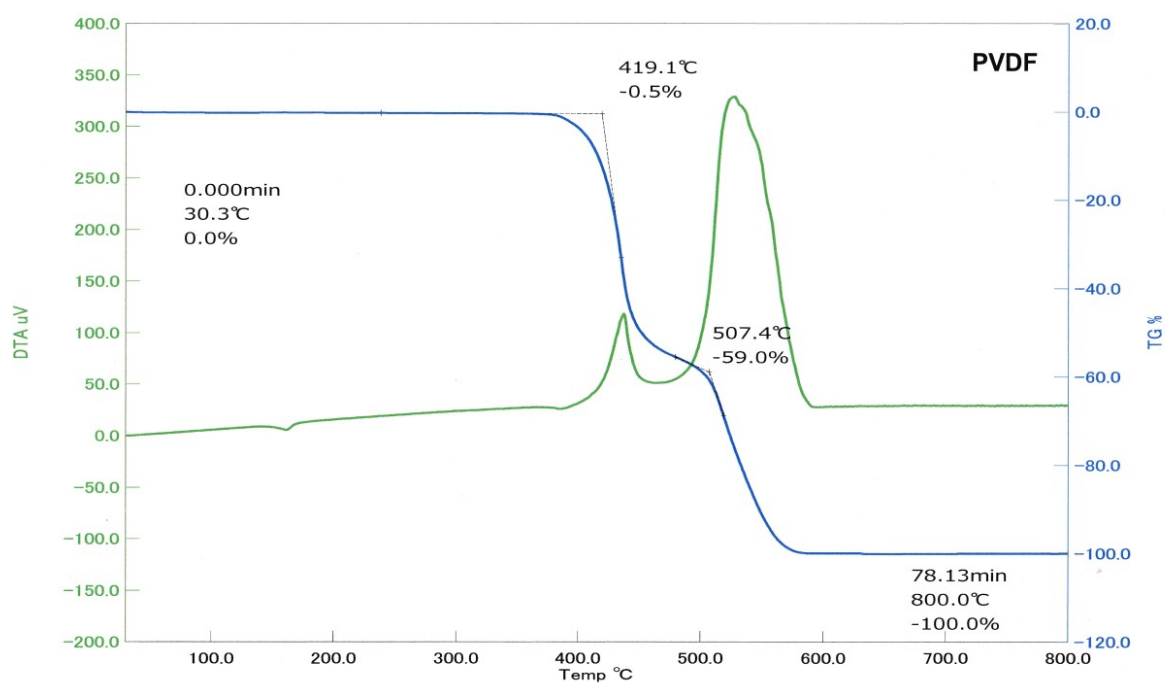

**Figure S-2.** TG/DTA curves for PVDF.

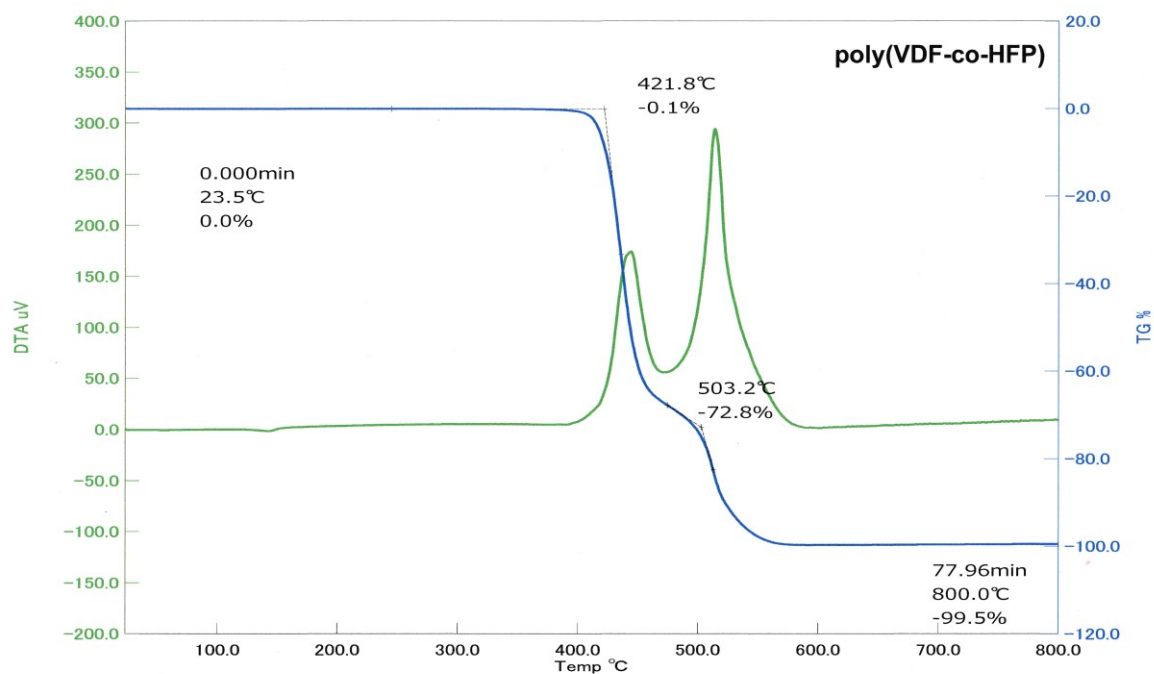

**Figure S-3.** TG/DTA curves for Poly(VDF-co-HFP).

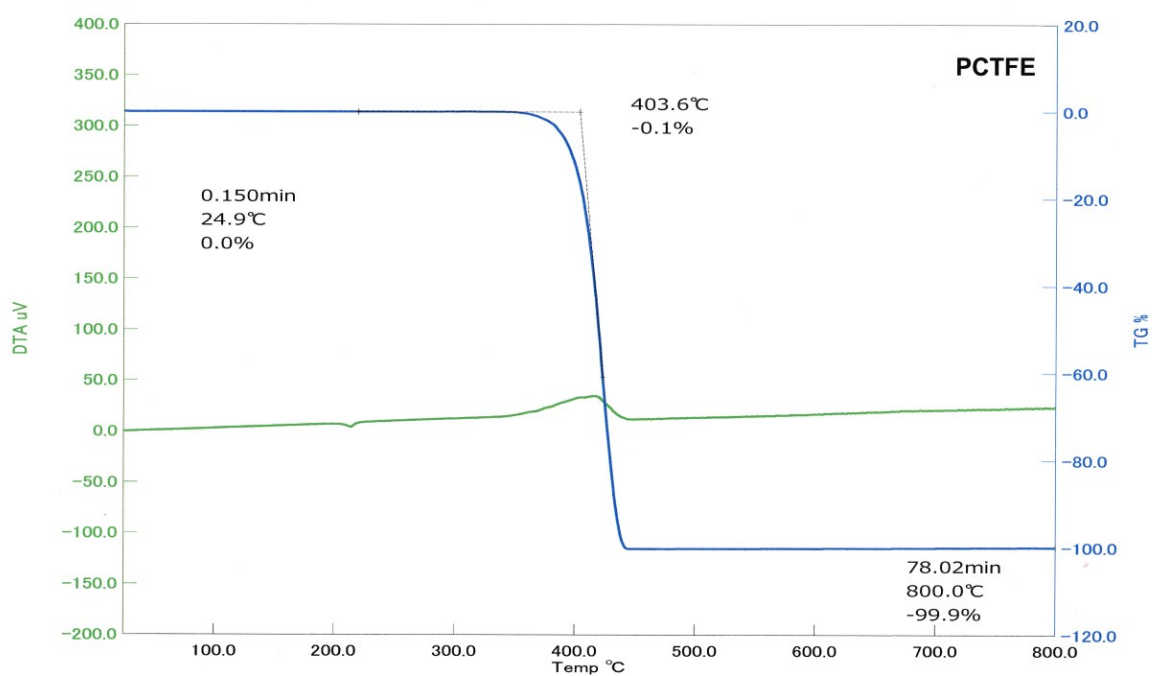

**Figure S-4.** TG/DTA curves for PCTFE.
